# Supplementary material
Source: Springer Nature journal article supplement (https://www.springermedizin.de/resource/supplementary/12969_2010_804_MOESM3_ESM.pdf/9593044)

(a)

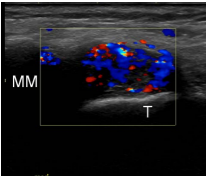

(b)

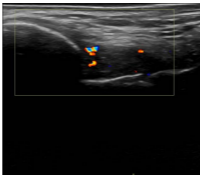

(c)

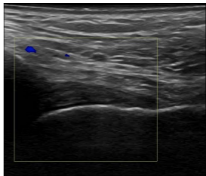

Supplement: MOESM3 [file 9593044]
